# Supplementary material for: A large ultrathin anatase TiO2 nanosheet/reduced graphene oxide composite with enhanced lithium storage capability
Source: Royal Society of Chemistry journal article supplement (doi:10.1039/c4ta00574k), 2014-01-01
Supplement: c4ta00574k1.pdf [file c4ta00574k1.pdf]

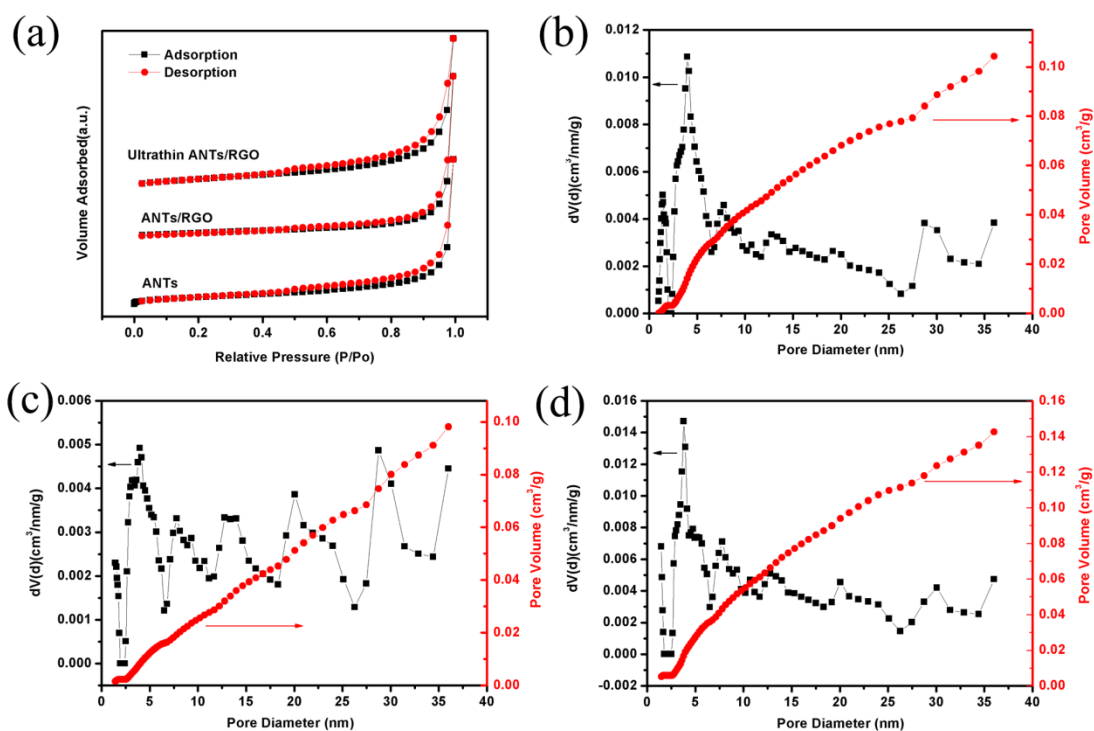

Figure. S1 Nitrogen adsorption-desorption isotherms of ANTs, ANTs/RGO, and ultrathin ANTs/RGO composites (a); Pore volume and pore size distributions curves of ANTs (b), ANTs/RGO (c), and ultrathin ANTs/RGO (d) composites.

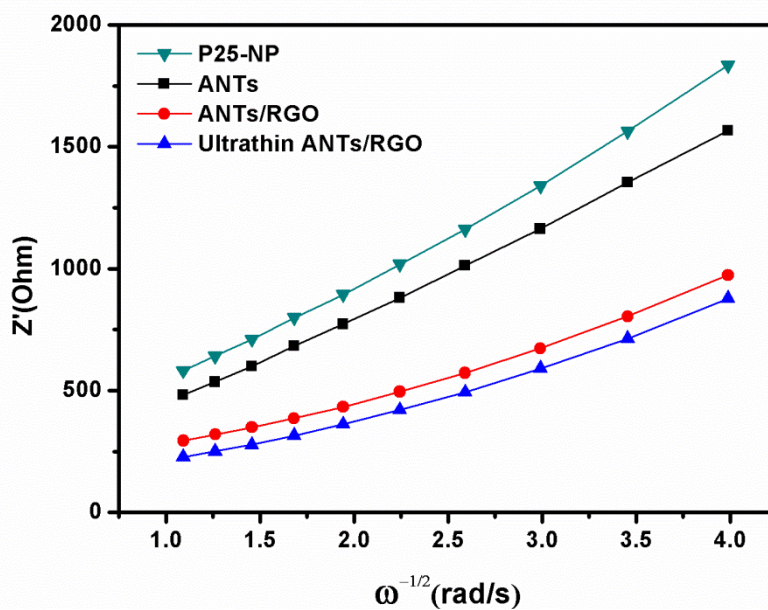

Figure. S2 Linear fittings between Z and the reciprocal of the square root of the angular frequency in the low frequency region.
